1 **Title**

2 NUCLEAR FACTOR Y, subunit A (NF-YA) proteins positively regulate flowering and act  
3 through *FLOWERING LOCUS T*

4

5 **Short Title**

6 Role of NF-YA in flowering

7

8 **Authors**

9 Chamindika L. Siriwardana<sup>1</sup>, Nerina Gnesutta<sup>2</sup>, Roderick W. Kumimoto<sup>3</sup>, Daniel S.  
10 Jones<sup>1</sup>, Zachary A. Myers<sup>1</sup>, Roberto Mantovani<sup>2</sup>, \*Ben F. Holt III<sup>1</sup>

11

12 **Affiliations**

13 <sup>1</sup> Department of Microbiology and Plant Biology, University of Oklahoma, Norman OK,  
14 USA

15 <sup>2</sup> Dipartimento di BioScienze, 6, Milan, Italy

16 <sup>3</sup> Department of Plant Biology, University of California, Davis CA, USA

17

18 \*Corresponding author

19 E-mail: [benholt@ou.edu](mailto:benholt@ou.edu)

20

21 **Abstract**

22 Photoperiod dependent flowering is one of several mechanisms used by plants to  
23 initiate the developmental transition from vegetative growth to reproductive growth. The  
24 NUCLEAR FACTOR Y (NF-Y) transcription factors are heterotrimeric complexes  
25 composed of NF-YA and histone-fold domain (HFD) containing NF-YB/NF-YC, that  
26 initiate photoperiod-dependent flowering by cooperatively interacting with CONSTANS  
27 (CO) to drive the expression of *FLOWERING LOCUS T* (*FT*). This involves NF-Y and  
28 CO binding at distal *CCAAT* and proximal “CORE” elements, respectively, in the *FT*  
29 promoter. While this is well established for the HFD subunits, there remains some  
30 question over the potential role of NF-YA as either positive or negative regulators of this  
31 process. Here we provide strong support, in the form of genetic and biochemical  
32 analyses, that NF-YA, in complex with NF-YB/NF-YC proteins, can directly bind the  
33 distal *CCAAT* box in the *FT* promoter and are positive regulators of flowering in an *FT*-  
34 dependent manner.

35

36

## 37 **Author Summary**

38 For plants to have reproductive success, they must time their flowering with the most  
39 beneficial biotic and abiotic environmental conditions - after all, reproductive success  
40 would likely be low if flowers developed when pollinators were not present or freezing  
41 temperatures were on the horizon. Proper timing mechanisms for flowering vary  
42 significantly between different species, but can be connected to a variety of  
43 environmental cues, including water availability, temperature, and day length.  
44 Numerous labs have studied the molecular aspects of these timing mechanisms and  
45 discovered that many of these pathways converge on the gene *FLOWERING LOCUS T*  
46 (*FT*). This means that understanding precisely how this gene is regulated can teach us  
47 a lot about many plant species in both natural and agricultural settings. In the current  
48 study, we focus on day length as an essential cue for flowering in the plant species  
49 *Arabidopsis thaliana*. We further unravel the complexity of *FT* regulation by clarifying the  
50 roles of *NUCLEAR FACTOR Y* genes in day length perception.

51

## 52 **Introduction**

53 Plants undergo numerous developmental phase changes that are both species specific  
54 and intimately linked to the environments in which they evolved. One of the most  
55 important phase changes - as evidenced by the numerous pathways controlling the  
56 process – is the transition from vegetative to reproductive growth (recently reviewed in  
57 (1)). For many plant species, a potent trigger of the transition to reproductive growth is  
58 photoperiod-dependent flowering. Photoperiod-dependent species use the relative  
59 length of day and night to either activate or repress flowering such that it is timed with  
60 the appropriate environmental conditions to maximize reproductive success.

61

62 The model plant *Arabidopsis thaliana* (*Arabidopsis*) is a so-called long day plant; that is,  
63 it flowers rapidly when days are longer than ~12 hrs (2-5). Central to measuring  
64 photoperiod is the circadian regulation of *CONSTANS* (*CO*) transcription and the light-  
65 mediated regulation of CO protein accumulation (6). CO protein is stabilized in long  
66 days and is able to bind and transcriptionally activate *FLOWERING LOCUS T* (*FT*) (7,  
67 8). FT protein is the principal mobile hormone - or “florigen” - that travels from leaves,  
68 where the photoperiod signal is perceived, to the shoot apex, where the floral transition  
69 occurs (9-12). In the shoot apex FT activates its downstream targets, which includes  
70 *SUPPRESSOR OF CONSTANS 1* (*SOC1*) and *APETALA 1* (*AP1*). Members of the  
71 heterotrimeric NUCLEAR FACTOR-Y (NF-Y) transcription factor family are required for  
72 activation of the *FT* promoter, thus initiating the downstream events leading to the floral  
73 transition (13-18).

74

75 NF-Y transcription factors are composed of three independent protein families, NF-YA,  
76 NF-YB, and NF-YC. To activate target genes, NF-YB and NF-YC dimerize in the  
77 cytoplasm and move to the nucleus where the heterodimer interacts with NF-YA to  
78 create the DNA-binding, heterotrimeric NF-Y transcription factor (21-24). NF-Y binding  
79 is widely regarded as sequence specific to the evolutionarily conserved *CCAAT* motifs,  
80 with some modified sites having been reported (15, 25, 26). All direct contacts with the  
81 pentanucleotide are made by NF-YA, while the NF-YB/NF-YC dimer primarily makes  
82 non-sequence specific contacts in adjacent regions, stabilizing the complex (27). NF-Y  
83 subunits have undergone an extensive expansion in plants (19, 20). For example,  
84 *Arabidopsis* has ten members of each *NF-Y* gene family (20).

85  
86 Several NF-YB and NF-YC subunits have been demonstrated to regulate photoperiod  
87 dependent flowering (13, 16-18, 28, 29). Briefly, *nf-yb2 nf-yb3* double and *nf-yc3 nf-yc4*  
88 *nf-yc9* triple mutants flower very late under normally inductive photoperiods (17). In both  
89 cases, the single mutants have either no effect or comparatively mild effects on  
90 flowering time, indicating overlapping functions for these family members. NF-YB and  
91 NF-YC proteins can physically interact with CO and loss of function mutations lead to  
92 *FT* expression downregulation (13, 16-18, 28). Finally, genetic and biochemical data  
93 suggest that NF-Y complexes bind the *FT* promoter at a distal *CCAAT* box (-5.3kb from  
94 start codon), while CO binds several clustered proximal **CO** regulatory elements (CORE  
95 – approx. -200bp upstream from start). Chromatin loops may stabilize the interactions  
96 between these two distally separated, DNA-bound complexes (8, 14, 30, 31).

97

98 In light of the NF-Y HFD interactions with CO in photoperiod-dependent flowering,  
99 immediate questions are whether NF-YA proteins are regulators of photoperiod-  
100 dependent flowering and whether this is CO-dependent and exerted through regulation  
101 of *FT*. Related to NF-YA roles in flowering, initial reports demonstrated that they can  
102 negatively regulate flowering as overexpression of some *NF-YA* genes caused late  
103 flowering (18, 32). Because NF-YA and CO proteins share a region of sequence  
104 homology, one possibility is that they compete for occupancy on NF-YB/C dimers: in  
105 this scenario, NF-YA and CO might play opposing negative and positive roles,  
106 respectively. However, recent reports suggest a more complex scenario, given 1)  
107 Genetic evidence for the importance of the -5.3kb *FT* CCAAT box in flowering (14, 30,  
108 31); 2) DNA bound mammalian NF-Y crystal structure showing that NF-YA makes the  
109 direct contacts with the CCAAT box and that CO shows differences in amino acids  
110 necessary for these contacts (14, 27, 33, 34); and 3) Evidence that CO directly binds  
111 CORE sites (8). In addition, Hou et al. (15) suggested that NF-YA2 was a positive  
112 regulator of flowering time, but, surprisingly, that this was mediated by interaction with a  
113 novel, non-CCAAT cis regulatory element called NF-YBE in the *SOC1* promoter, and  
114 not the binding and regulation of *FT* expression.

115  
116 As reported for *co* mutants (35), multiple groups have demonstrated that *nf-yb* and *nf-yc*  
117 mutants also had strongly reduced *FT* expression and that these reductions were  
118 directly correlated with alterations in flowering time (16-18, 28, 36). Likewise,  
119 overexpression of *NF-YB* and *NF-YC* genes was associated with *FT* upregulation (16,  
120 28, 37-39). Mutations in cis-regulatory elements bound by either CO or NF-Y complexes

121 in the *FT* promoter (*CCAAT* and/or *CORE*, respectively) also reduced *FT* expression in  
122 a manner that was directly correlated with the severity of flowering delays (14, 16, 17,  
123 30). Further, constitutive overexpression of *CO* drove increased *FT* expression and  
124 early flowering, but these phenotypes were strongly reduced or eliminated in *nf-yb* and  
125 *nf-yc* mutants or when the -5.3kb *CCAAT* site was eliminated (17, 30, 38). Finally,  
126 multiple labs have shown *in vivo* and *in vitro* binding of NF-Y and CO proteins to the *FT*  
127 promoter and mutations in the associated *CCAAT* and *CORE* cis-regulatory elements  
128 additively reduce *FT* expression and delay flowering (7, 8, 14, 30). Thus, it remains very  
129 well-supported that photoperiod-dependent flowering is mediated through direct  
130 regulation of *FT* by CO and NF-Y complexes.

131  
132 Here we address the roles of NF-YA proteins in *FT* binding, expression regulation, and  
133 photoperiod-dependent flowering time. Using a combination of genetic and biochemical  
134 approaches, we show complete NF-Y complexes, including NF-YA, bound to the -5.3kb  
135 *FT CCAAT* box. We further demonstrate that NF-YA and NF-YB constructs that can  
136 drive early flowering do this activity in an *FT*-dependent manner. Because *SOC1* is  
137 downstream of *FT* (40), our data further indicate that *FT* is a key regulatory target of NF-  
138 Y/CO complexes in the photoperiod-dependent flowering pathway.

139

## 140 **Results**

### 141 ***NF-YA* genes can be positive regulators of photoperiod dependent flowering**

142 To identify NF-YAs involved in flowering, we first examined constitutive overexpression  
143 (35S promoter) in first generation (T1) transgenic plant lines for each of the 10

144 Arabidopsis *NF-YA* genes (lines described in (41)). We observed that *p35S:NF-YA2* and  
145 *p35S:NF-YA6* expressing plants consistently flowered earlier than Col-0. Nevertheless,  
146 confident interpretations of these data were complicated by the pleiotropic, dwarf  
147 phenotypes in most overexpressing lines. In fact, lines that constitutively overexpressed  
148 *NF-YA6* were infertile and did not survive (as previously described, (41)). We were able  
149 to isolate and quantify stable, third generation transgenic *p35S:NF-YA2* lines and  
150 compare them to several other stable lines for constitutively expressed *NF-YA* genes  
151 (Fig 1A). Two independent *p35S:NF-YA2* lines flowered early (~10 leaves, compared to  
152 13 for wild type Col-0 plants), while overexpression of other *NF-YA* genes either did not  
153 alter flowering or actually caused modestly later flowering. This is consistent with the  
154 original observations of Wenkel (18). We note that all of these plant lines showed similar  
155 dwarf phenotypes, suggesting that our flowering time observations were not directly  
156 correlated with this phenotype.

157

158 **Fig 1. *NF-YA2* is a positive regulator of photoperiod dependent flowering.**

159 A) Flowering time quantification of two independent *p35S:NF-YA2*, *p35S:NF-YA7*,  
160 *p35S:NF-YA8*, and *p35S:NF-YA9* plant lines. B) Flowering time quantification of  
161 two independent *pNF-YA2:NF-YA2* plant lines. C) The expression pattern of  
162 *pNF-YA2-GUS* in leaves of 10 day old plants. D) Expression of *CO*, *FT*, and *AP1*.  
163 Asterisks in 1A and 1B represent significant differences derived from one-way  
164 ANOVA ( $P < 0.05$ ) followed by Dunnett's multiple comparison post hoc tests  
165 against Col-0. Asterisks in 1D represent significant differences derived from  
166 Student's T-tests ( $p < 0.05$ ).



167

168 To avoid the pleiotropic effects from ectopically overexpressing *NF-YA2*, we additionally  
169 generated stable, native promoter transgenic plant lines (*pA2:NF-YA2*). Presumably due  
170 to position effects, some of these lines expressed high levels of *NF-YA2* (~60 fold  
171 overexpressed) and were early flowering (Fig 1B, S1 Fig). Interestingly, these plants  
172 appeared phenotypically normal, suggesting that the dwarf phenotypes of *p35S*-driven  
173 lines is more related to ectopic expression than overexpression, *per se*. Note that our  
174 previous research on *NF-Y:GUS* expression patterns showed that both *NF-YA2* and  
175 *NF-YA6* had very strong vascular expression, consistent with the expected localization  
176 of floral promoting genes (Fig 1C and (17, 30, 31, 33, 42, 43)).

177

178 As discussed above, previous reports suggest that *CO*, *NF-YB* and *NF-YC* regulate  
179 flowering primarily by controlling *FT* expression which, in turn, rapidly upregulates *AP1*  
180 (16, 17, 28, 30, 31, 35, 40, 44). We used the stable *pNF-YA2:NF-YA2-1* plant line to test  
181 if *NF-YA2* regulates the same set of genes. We used the time points of seven and nine  
182 days after germination because they correlate with the initiation of flowering signals in  
183 long day grown plants (42). *NF-YB* and *NF-YC* do not affect the expression of *CO* (16,  
184 17, 28); likewise, *CO* was not misregulated in the *NF-YA2* overexpressor (Fig 1C).  
185 However, the expression of *FT* was upregulated in seven day old *pNF-YA2:NF-YA2*  
186 plants, which was followed by significant *AP1* upregulation by day nine. These results  
187 suggest that *NF-YA2*, like its *NF-YB* and *NF-YC* counterparts, regulates flowering by  
188 controlling *FT* expression.

189

190 **The NF-YB2<sup>E65R</sup> mutation prevents NF-YA subunits from entering into NF-Y**  
191 **complexes**

192 Because of the apparent difficulties in working directly with NF-YAs, the likely  
193 overlapping functionality between family members in flowering (e.g., Hou reports that *nf-*  
194 *ya2* mutants have no flowering delay, (15)), and lethality (45, 46), we decided to  
195 indirectly manipulate NF-YA function by altering its ability to interact with the HFD dimer.  
196 In mammals, the NF-YB<sup>E92R</sup> mutant protein specifically loses interaction with NF-YA, but  
197 not NF-YC (22). Crystal structure analysis of the NF-Y complex demonstrated that this  
198 glutamic acid makes multiple contacts with NF-YA Arg249 and Arg253 (27). Alignments  
199 between human and Arabidopsis NF-YB proteins show that this glutamic acid (E65 in  
200 Arabidopsis NF-YB2) is completely conserved (Fig 2A) and examination of other  
201 published alignments also confirm this conservation in the monocot lineage (33, 47-49).  
202 Thus, we reasoned that NF-YB2<sup>E65R</sup> mutations would eliminate the ability of NF-YA to  
203 enter floral promoting NF-Y complexes and allow us to further test the hypothesis that  
204 NF-YA proteins are positive regulators of photoperiod-dependent flowering.

205

206 **Fig 2. NF-YB2<sup>E65R</sup> loses interaction with NF-YA subunits** A) Alignment of the  
207 core domain of human and Arabidopsis NF-YB subunits. \* marks the position of  
208 the conserved glutamic acid required for interaction with NF-YA in humans (27).  
209 B) NF-YB2 and NF-YB2<sup>E65R</sup> interact with NF-YC3, NF-YC4, and NF-YC9 in Y2H  
210 assays. C) NF-YB2, but not NF-YB2<sup>E65R</sup>, interacts with NF-YA2 when NF-YC9 is  
211 expressed using a bridge vector in yeast three-hybrid assays.

212

213 We first used yeast two hybrid assays to test if NF-YB2<sup>E65R</sup> could interact with NF-YC3,  
214 NF-YC4, and NF-YC9: indeed, we found that both NF-YB2 and NF-YB2<sup>E65R</sup> were able  
215 to physically interact with the NF-YCs (Fig 2B). Since NF-YA trimerizes with HFD  
216 dimers and not individually with NF-YB or NF-YC (50), we used yeast three hybrid  
217 assays to test the ability of NF-YA2 to enter into a complex with NF-YB2<sup>E65R</sup> and NF-  
218 YC9 (Fig 2C). As predicted, NF-YA2/NF-YB2/NF-YC9 complexes formed, but the NF-  
219 YB2<sup>E65R</sup> variant prevented formation of the trimeric NF-Y complex. Thus, the NF-  
220 YB2<sup>E65R</sup> provides a powerful genetic tool to test the requirement for NF-YA in  
221 photoperiod-dependent flowering.

222

### 223 **The NF-YB2<sup>E65R</sup> mutation prevents rescue of a late flowering *nf-yb2 nf-yb3* mutant**

224 We predicted that *p35S:NF-YB2<sup>E65R</sup>* would be unable to drive early flowering in wild  
225 type Col-0 or rescue the *nf-yb2 nf-yb3* late flowering phenotype. We tested this by  
226 overexpressing both *p35S:NF-YB2* and *p35S:NF-YB2<sup>E65R</sup>* in each background. As  
227 previously described, here and throughout this study, we examined T1 plants as it gave  
228 a better representation of the response by eliminating bias associated with the selection  
229 of individual transgenes. For each transgene we examined 15-20 individual plants and  
230 for selected experiments we generated two independent T3 transgenic lines for further  
231 testing (14). We found that *p35S:NF-YB2* showed a trend towards earlier flowering in  
232 Col-0, but only caused significantly earlier flowering in a subset of independent  
233 experiments (Fig 3A, non-significant example shown). However, *p35S:NF-YB2 nf-yb2*  
234 *nf-yb3* plants flowered ~20 leaves earlier than the parental mutant (Fig 3B-D). With the  
235 *p35S:NF-YB2<sup>E65R</sup>* version, Col-0 actually flowered significantly later than normal

236 (indicating dominant interference with the endogenous complexes) and there was no  
237 rescue of the *nf-yb2 nf-yb3* late flowering phenotype (Fig 3A-D).

238

239 **Fig 3. *p35S:NF-YB2<sup>E65R</sup>* cannot rescue the *nf-yb2 nf-yb3* late flowering**  
240 **phenotype.** A) Flowering time quantification of T1 *p35S:NF-YB2* and *p35S:NF-*  
241 *YB2<sup>E65R</sup>* plants in the Col-0 background. B) Flowering time quantification of T1  
242 *p35S:NF-YB2* and *p35S:NF-YB2<sup>E65R</sup>* plants in the *nf-yb2 nf-yb3* background. C)  
243 Flowering time quantification of stable T3 *p35S:NF-YB2* and *p35S:NF-YB2<sup>E65R</sup>*  
244 plants in the *nf-yb2 nf-yb3* background. D) Representative plants of *p35S:NF-*  
245 *YB2* and *p35S:NF-YB2<sup>E65R</sup>* in the *nf-yb2 nf-yb3* background. E) Expression of  
246 *NF-YB2*, *FT* and *AP1* in the *nf-yb2 nf-yb3* background. Asterisks in 3A, 3B and  
247 3C represent significant differences derived from one-way ANOVA ( $P < 0.05$ )  
248 followed by Dunnett's multiple comparison post hoc tests against *nf-yb2 nf-yb3*.

249

250 To confirm that *NF-YB<sup>E65R</sup>* was localizing properly, we compared plants expressing *NF-*  
251 *YB2-YFP* and *NF-YB2<sup>E65R</sup>-YFP* and found that both had identical nuclear localization  
252 patterns (S2A Fig). Additionally, we measured *NF-YB* protein accumulation in late  
253 flowering *p35S:NF-YB2<sup>E65R</sup>* T1 plants (all >31 leaves at flowering) compared to a well-  
254 characterized, stable, early flowering *p35S:NF-YB2* line (all proteins were translationally  
255 fused to the HA epitope). The *p35S:NF-YB2<sup>E65R</sup>* T1 lines showed the expected variation  
256 in *NF-YB* protein accumulation; note that even lines that strongly accumulated *NF-*  
257 *YB2<sup>E65R</sup>* could not rescue late flowering (S2B Fig; e.g., compare protein accumulation in  
258 *p35S:NF-YB2<sup>E65R</sup>* lines 6, 10, 11, and 12 to the stable *p35S:NF-YB2* line). Stable, single

259 insertion T3 lines showed the same pattern of late flowering regardless of high NF-  
260 YB2<sup>E65R</sup> accumulation (Fig 3C and S2C Fig). Finally, we compared stable *p35S:NF-YB2*  
261 *nf-yb2 nf-yb3* and *p35S:NF-YB2<sup>E65R</sup> nf-yb2 nf-yb3* for expression of *NF-YB2*, *FT*, and  
262 *AP1* (Fig 3E). Although both lines had very high, ~equivalent *NF-YB2* expression,  
263 *p35S:NF-YB2* resulted in increased *FT* and *AP1* expression while *p35S:NF-YB2<sup>E65R</sup>*  
264 significantly suppressed both. Collectively, we take these data as strongly suggestive  
265 data that NF-YA participation in trimer formation is important for the promotion of  
266 flowering.

267

### 268 **NF-YA2 and NF-YA6 heterotrimerize with NF-YB2 and NF-YC3 *in vitro* to bind the -** 269 **5.3kb CCAAT box**

270 We previously showed that NF-YB2 and NF-YC3, together with mouse NF-YA, are able  
271 to bind a 31bp, CCAAT-containing oligonucleotide from the *FT* -5.3kb site (14). At that  
272 time we were unsure of the likely Arabidopsis NF-YA(s) involved in flowering: with the  
273 data presented here and a recent publication (15) showing that NF-YA2 and NF-YA6  
274 can act as positive regulators of flowering, we used EMSA to test if NF-YA2 and NF-  
275 YA6 are able to bind a probe encompassing the -5.3kb CCAAT box on *FT*. In the  
276 presence of NF-YB2/NF-YC3 dimers, NF-YA2 and NF-YA6 bound the CCAAT probe in  
277 a concentration-specific manner (Fig 4). However, neither NF-YA2 nor NF-YA6 could  
278 individually bind the CCAAT probe. Further, CO did not bind the CCAAT probe,  
279 individually or in the presence of the NF-YB2/NF-YC3 dimer. We additionally tested  
280 equivalent concentrations of NF-YA2 with the NF-YB2<sup>E65R</sup>/NF-YC3 and found that this  
281 combination completely lost the ability to bind the CCAAT probe. Collectively, this data

282 shows that plant NF-Y complexes interact and bind the *FT* -5.3kb CCAAT box in a  
283 manner that is similar, if not identical, to the mammalian counterparts.

284

285 **Fig 4. NF-YA2 and NF-YA6 bind the *FT*-5.3kb CCAAT box as a trimer with**  
286 **NF-YB2 and NF-YC3.** NF-Y trimerization and *FT* CCAAT binding was assessed  
287 by EMSA analysis. An *FT* CCAAT probe was incubated with wild type (WT, lanes  
288 2-8; 20) or E65R mutant (B2<sup>E65R</sup>, lanes 15-18; 21) NF-YB2/NF-YC3 dimers (60  
289 nM) in the presence of NF-YA2 (lanes 3-5; 16-18), or NF-YA6 (lanes 6-8) at  
290 increasing molar ratios (3, 4.5 or 6 fold), or CO (lanes 20, 21; 6 fold molar ratio).  
291 As controls, NF-YA2 (lane 9), NF-YA6 (lane 10), or CO (lane 22) were incubated  
292 alone with the probe, at the highest concentration of the dose curve (360 nM), in  
293 the absence of NF-YB2/NF-YC3. Lanes 1, 11, 14, 19: probe alone, without  
294 protein additions; lanes 12, 13: empty lanes. The NF-Y/DNA complex is indicated  
295 by a labelled arrowhead. fp: free probe.

296

297 ***p35S:NF-YB2<sup>E65R</sup>* fused to a strong activation domain is not able to induce**  
298 **flowering in a *CONSTANS*-deficient mutant**

299 A potential criticism of using NF-YB<sup>E65R</sup> as a tool to demonstrate an NF-YA requirement  
300 in flowering is that we do not know how it might affect interactions with other  
301 components involved in photoperiod-dependent flowering. In particular, we do not know  
302 if it might impact CO recruitment or binding to its CORE site. However, when a strong  
303 transcriptional activation domain (called EDLL) was fused to NF-YB2, it was able to  
304 drive early flowering in a *co-9* loss of function mutant (38). Therefore, if NF-YA

305 interactions are relevant in flowering, we expect that an  $NF-YB2^{E65R}$ -EDLL would not be  
306 able to drive early flowering or rescue a *co* mutant.

307  
308 We first overexpressed (35S) *NF-YB2-EDLL* in Col-0 and extended the findings to the  
309 *co-2* mutant in the Ler ecotype (Fig 5A-B): while *NF-YB2* alone did not drive early  
310 flowering, *NF-YB2-EDLL* expressing plants were consistently earlier, thus confirming  
311 previous data (38). However, in each case, *NF-YB2<sup>E65R</sup>-EDLL* either caused later  
312 flowering (presumably the dominant negative effect again, Fig 3A) or had no effect. We  
313 then used the *nf-yb2 nf-yb3* background where *NF-YB2* plants flowered at a mean of  
314 ~21 leaves and *NF-YB2-EDLL* flowered at ~12 leaves (Fig 5C); *NF-YB2<sup>E65R</sup>-EDLL* was  
315 once again unable to alter flowering time. Short day grown plants, which mimic a *co*  
316 mutant because CO is unable to accumulate (2), told the same story - *NF-YB2-EDLL*,  
317 but not *NF-YB2<sup>E65R</sup>-EDLL*, caused earlier flowering (Fig 5D). Finally, we repeated the  
318 entire transgenic panel in the loss of function *ft-10* mutant (Fig 5E). Importantly, all  
319 constructs, including *NF-YB2-EDLL*, failed to cause significantly earlier flowering in the  
320 *ft-10* genetic background. Collectively, this data adds additional evidence for NF-YA as  
321 a positive, *FT*-dependent regulator of photoperiod-dependent flowering.

322  
323 **Fig 5. *NF-YB2-EDLL*, but not *NF-YB2<sup>E65R</sup>-EDLL*, rescues late flowering in an**  
324 ***FT*-dependent manner.** T1 flowering time quantification of *p35S:NF-YB2*,  
325 *p35S:NF-YB2-EDLL*, and *p35S:NF-YB2<sup>E65R</sup>-EDLL* in A) Col-0 B) *co-2* C) *b2b3*  
326 D) short days E) *ft-10*. Asterisks represent significant differences derived from  
327 one-way ANOVA ( $P < 0.05$ ) followed by Bonferroni's multiple comparison tests.

328

329 ***NF-YA2-EDLL* induces flowering in a *CONSTANS*-deficient mutant**

330 We hypothesized that if *NF-YA2* is able to interact with *NF-YB/NF-YC* dimers on the *FT*  
331 promoter, attaching the *EDLL* domain to the *pNF-YA2:NF-YA2* construct would also  
332 induce flowering in *co* mutants. If true, this would significantly extend the *NF-YB2*<sup>E65R</sup>  
333 and EMSA results above, ameliorating possible concerns about relying on *NF-YB2*<sup>E65R</sup>  
334 as a proxy measure of *NF-YA* function. Again, we first tested flowering responses in the  
335 Col-0 background. Both *pNF-YA2:NF-YA2* and *pNF-YA2:NF-YA2-EDLL* drove earlier  
336 flowering (Fig 6A). In the *co-2* background, *pNF-YA2:NF-YA2-EDLL* induced much  
337 earlier flowering (~20 leaves earlier than *co-2*), whereas the control *pNF-YA2:NF-YA2*  
338 did not (Fig 6B). As with *NF-YB2-EDLL* (Fig 5E), *NF-YA2-EDLL* was completely unable  
339 to induce flowering in the *ft-10* background (Fig 6C), indicating once again an *FT*-  
340 dependent, positive role for *NF-YA* proteins in flowering.

341

342 **Fig 6. *pNF-YA2:NF-YA2-EDLL* can induce flowering in the absence of CO.**

343 Flowering time in A) Col-0, B) *co-2*, and C) *ft-10*. Asterisks represent significant  
344 differences derived from one-way ANOVA ( $P < 0.05$ ) followed by Bonferroni's  
345 multiple comparison tests.

346

347 **Discussion**

348 Our initial understanding of *NF-Y* roles in flowering was primarily driven by evidence of  
349 physical interactions between individual *NF-Y* subunits and *CO*, as well as *in planta*  
350 overexpression analyses (13, 18). Thereafter, loss of function mutations in HFD



351 subunits identified specific *NF-YB* and *NF-YC* genes involved in flowering (16, 28, 51).  
352 Demonstrating roles for *NF-YAs* has proven more difficult, since they appear to have  
353 redundant functions, and overexpressing them leads to substantially deleterious  
354 pleiotropic effects (41, 52, 53). Here we have attempted to work around these difficulties  
355 with a variety of biochemical and genetic approaches. We provide a compelling body of  
356 evidence that *NF-YA2* and *NF-YA6*, and perhaps other *NF-YAs*, can activate *FT*  
357 expression, and are *FT*-dependent, positive regulators of flowering.

358  
359 Previously, *NF-YAs* were believed to act as negative regulators of flowering, because  
360 overexpression of two *NF-YA* genes, *NF-YA1* and *NF-YA4*, led to later flowering (18).  
361 We noticed the same response with *NF-YA7* and *NF-YA9* overexpressors. In another  
362 study by Leyva-Gonzalez (52), this was also the outcome of generalized overexpression  
363 of *NF-YAs*. A recent publication showed that *NF-YA2* represses stress-mediated  
364 flowering responses (32). Further *miR169* was shown to target and degrade *NF-YA2*  
365 transcripts, which led to an induction of flowering through the downregulation of *FLC*  
366 and resulting upregulation of *FT*. However, there were a few question areas that were  
367 not clearly addressed. Loss-of-function mutants of *FLC* do not have an effect on  
368 flowering in Col-0 plants under LD conditions (54), and how the down regulation of *FLC*  
369 led to the flowering phenotypes under these conditions is not clear. Nevertheless, our  
370 observation of early flowering in *NF-YA2* overexpression lines is consistent with those  
371 recently reported (15). The central role of *FT* in the regulation of flowering has been  
372 established, and the recent report that *NF-Ys* regulate photoperiod-dependent flowering  
373 *via SOC1*, instead of *FT* (15), seems at odds with existing evidence, as well as

374 experiments presented here. Elegant genetic experiments previously demonstrated that  
375 *SOC1* activation is downstream of *FT* in a linear pathway (40). Therefore, if NF-Ys are  
376 directly binding and activating *SOC1* to activate photoperiod-dependent flowering, *FT*  
377 loss of function alleles (such as *ft-10* used here) should not impair this function.  
378 However, we find that *p35S:NF-YA-EDLL* and *p35S:NF-YB-EDLL* cannot drive early  
379 flowering in the absence of *FT*, strongly suggesting that *SOC1* is not their only target in  
380 photoperiod-dependent flowering. We do not rule out the possibility that the NF-Y are  
381 also involved in the direct regulation of *SOC1*; however, regulation of *SOC1* alone  
382 cannot explain the flowering phenotypes discussed here.

383  
384 Regulation of the *FT* promoter is influenced by a plethora of pathways and numerous  
385 *cis*-regulatory elements continue to emerge (14, 30, 31, 55). One of these is the -5.3kb  
386 *CCAAT* enhancer site, where both deletions and mutations significantly delay flowering  
387 time (14, 30, 56). We provide here formal *in vitro* evidence that complexes formed by  
388 NF-YA2 and NF-YA6, associated with NF-YB2/NF-YC3, robustly and specifically bind to  
389 this site. Interestingly, the phenotype of the -5.3kb *CCAAT* mutant was not as strong as  
390 those from *nf-y* HFD loss of function alleles (14, 16), implying that there must be  
391 additional *CCAAT* sites bound by the NF-Y trimer in the *FT* promoter or that NF-Y  
392 subunits also regulate non-*CCAAT* sites. Another set of important sites responsible for  
393 CO activation, CORE, are in the proximal promoter (8, 30). Indeed, the near complete  
394 loss of photoperiod-dependent flowering responses in *nf-yb2 nf-yb3* and *co* mutants  
395 strongly argues that NF-Y complexes and CO must be necessary for function at both  
396 *cis*-regulatory regions. In keeping with this, we recently showed that NF-Y, bound to the

397 -5.3kb CCAAT, and CO, bound to CORE sites, physically interact via a chromatin loop.  
398 Further, simultaneous mutations in the -5.3kb CCAAT, CORE1 and CORE2 sites in the  
399 *FT* promoter nearly eliminated rescue of an *ft-10* mutant (14). The importance of the -  
400 5.3 kb CCAAT element implies a role of the sequence-specific subunit NF-YA; however,  
401 the interactions of the HFD subunits with CO, and the resulting enhancer-promoter  
402 connections through CORE, made the direct demonstration of NF-YA function in *FT*  
403 expression and flowering all the more important.

404

405 NF-YB<sup>E65R</sup> overexpressors were not able to rescue the late flowering phenotype of the  
406 *nf-yb2 nf-yb3* mutant. We formally excluded that this was due to expression levels and  
407 we could also exclude that the mutant folded incorrectly for two reasons: 1)  
408 Recombinant production in *E. coli* recovered wt and E65R as soluble proteins when co-  
409 expressed with NF-YC3, and indeed both were easily purified, and 2) The mutant had a  
410 dominant negative effect on flowering time when overexpressed in Col-0 plants. A  
411 similar conclusion on the dominant negative nature of the glutamic acid mutation was  
412 made for rat NF-YB (CBF-A) *in vitro* (22), but this is the first demonstration that it could  
413 also act *in vivo*. The likeliest explanation for the dominant negative behavior of NF-  
414 YB2<sup>E65R</sup> is related to formation of HFD heterodimers impaired in trimer formation, and  
415 hence normal NF-Y function – i.e., it is possible that they subtract functional NF-YCs,  
416 which would otherwise enter the normal trimerization/CCAAT-binding processes.  
417 Obviously, we cannot formally rule out the possibility that the NF-YB2<sup>E65R</sup> mutant lost  
418 interaction with proteins other than NF-YA and that this resulted in the lack of rescue of  
419 late flowering.

420

421 To rule out the possibility that the NF-YB2<sup>E65R</sup> flowering phenotypes were possibly due  
422 to loss of interaction with CO, we used the EDLL transactivation domain. CO was  
423 previously demonstrated to provide an activation domain for the NF-Y complex and NF-  
424 YB2 was able to drive flowering in the absence of CO when fused to the EDLL  
425 activation domain (38). However, in the current study, *p35S:NF-YB2<sup>E65R</sup>-EDLL* was not  
426 able to induce flowering indicating that while CO provides an activation domain for the  
427 NF-Y complex, the HFD dimer is non-functional in the absence of NF-YA. Our EMSA  
428 data further connects an NF-YA requirement to the capacity to bind at *CCAAT* elements.  
429 Finally, the flowering phenotypes for *pNF-YA2:NF-YA2-EDLL* were essentially the same  
430 as *p35S:NF-YB2-EDLL*. Both constructs were able to induce flowering in *co* mutants,  
431 were not able to induce flowering in *ft-10* mutants, and drove earlier flowering in Col-0.  
432 Collectively, these data strongly suggest that NF-YA2 is required for photoperiod-  
433 dependent flowering, acts directly on the *FT* promoter, and is *FT*-dependent.

434

## 435 **Methods**

### 436 ***Multiple sequence alignments***

437 Protein sequences were obtained from TAIR (<http://www.arabidopsis.org> (57) or  
438 National Center for Biotechnology Information (<http://www.ncbi.nlm.nih.gov/>) and  
439 manipulated in TextWrangler (<http://www.barebones.com>) Multiple sequence  
440 alignments were made using ClustalX (58) and shaded within Geneious  
441 (<http://www.geneious.com/>).

442

443 **Generation of overexpression constructs**

444 The *p35S:NF-YB2* and the ten *p35S:NF-YA* constructs were previously described (41,  
445 49), as was the 35S promoter (59). *NF-YB2<sup>E65R</sup>* was amplified from cDNA using  
446 mutagenic PCR. *pNF-YA2:NF-YA2* was amplified using genomic DNA with the promoter  
447 region starting approximately 1 KB upstream of the start codon. The proof reading  
448 enzyme Pfu Ultra II (cat#600670; Agilent Technologies) was used for PCR reactions  
449 and the resulting fragments were ligated into GATEWAY<sup>TM</sup> entry vector pENTR/D-  
450 TOPO (cat#45-0218; Invitrogen). The EDLL domain (38) was amplified from cDNA and  
451 contained *Acs1* sites, which were used to clone the EDLL domain into the pENTR/D-  
452 TOPO backbone of *NF-YB2* and *NF-YB2<sup>E65R</sup>* entry clones. All entry clones generated  
453 were sequenced and other than the point mutation were identical to sequences at TAIR  
454 (<http://www.arabidopsis.org> (57)). Entry clones were sub-cloned into the following  
455 destination vectors using the GATEWAY<sup>TM</sup> LR Clonease II reaction kit (cat#56485;  
456 Invitrogen): *NF-YB2<sup>E65R</sup>* into pEarlyGate101 (60); *NF-YB2*, *NF-YB2-EDLL* and *NF-*  
457 *YB2<sup>E65R</sup>-EDLL* into pK7FWG2 (61); *pNF-YA2:NF-YA2* and *pNF-YA2:NF-YA2-EDLL* into  
458 pEarlyGate301 (60) S1 Table lists primer sequences used for cloning and mutagenesis.

459

460 **Plant transformation, cultivation and flowering time experiments**

461 *Arabidopsis thaliana* ecotype Columbia (Col-0) was the wild type for all experiments. *nf-*  
462 *yb2 nf-yb3, ft-10 and co-2* (40, 49, 62) were previously described. Plants were  
463 transformed using Agrobacterium mediated floral dipping (63). Plants were cultivated in  
464 a custom-built walk-in chamber under standard long day conditions (16h light/8h dark)  
465 using plant growth conditions previously described (41) . Leaf number at flowering was

466 measured as the total number of rosette and cauline leaves on the primary axis at  
467 flowering.

468

469 ***Protein expression and purification.***

470 The cDNAs encoding for NF-YA2 (aa 134-207) and NF-YA6 (aa 170-237) were  
471 obtained by gene synthesis (Eurofins Genomics) and cloned into pNEA/tH (64) by  
472 restriction ligation with NdeI and BamHI to obtain C-terminal 6His-tag fusions. The CCT  
473 domain of CONSTANS (aa 290-352), with the addition of a 5' ATG, was cloned into  
474 pNEA/tH via PCR amplification followed by restriction ligation with XhoI and MunI to  
475 obtain C-terminal 6His-tag fusions. Clones were verified by sequence analysis. *NF-YB2*  
476 mutant cDNA, encoding for aa 24-116 with residue E65 mutated to R (*NF-YB2<sup>E65R</sup>*) was  
477 obtained by gene synthesis and subcloned in pET15b to obtain N-terminal 6His-tag  
478 fusion. 6His-NF-YB2 or 6His-NF-YB2<sup>E65R</sup>/NF-YC3 soluble HFD dimers were produced  
479 by co-expression in *E. coli* BL21(DE3) and purified by ion metal affinity chromatography  
480 (IMAC) as described in (65). NF-YA2-6His, NF-YA6-6His or CO-6His were expressed in  
481 BL21(DE3) by IPTG induction (0.4mM IPTG for 4h at 25C) and purified by IMAC  
482 (HisSelect, SIGMA-Aldrich) in buffer A (10mM Tris pH 8.0, 400mM NaCl, 2mM MgCl<sub>2</sub>,  
483 5mM imidazole). Purified proteins were eluted in Buffer A containing 100mM imidazole,  
484 and dialysed against Buffer B (10mM Tris-Cl pH 8.0, 400mM NaCl, 2mM DTT, 10 %  
485 glycerol).

486

487 ***Electrophoretic Mobility Shift Assays.***

488 EMSA analyses were performed essentially as previously described (14, 64, 65).  
489 Heterotrimer formation and CCAAT-box DNA-binding of wt or mutant NF-YB2/NF-YC3  
490 dimers was assessed by addition of purified NF-YAs (or CO) using the Cy5-labeled *FT*  
491 CCAAT probe (14). DNA binding reactions (1 $\mu$ l) (20nm *FT* CCAAT probe, 12mM Tris-  
492 HCl pH 8.0, 50mM KCl, 62.5mM NaCl, 0.5mM EDTA, 5mM MgCl<sub>2</sub>, 2.5mM DTT, 0.2  
493 mg/ml BSA, 5% glycerol, 6.25ng/ $\mu$ l poly dA-dT) were incubated with wt or mutant NF-  
494 YB2/NF-YC3 dimers (60nm), with or without NF-YA2 or -YA6 (or CO), as indicated in  
495 Figure 4. Proteins were pre-mixed in Buffer B containing 0.1 mg/ml BSA, then added to  
496 DNA binding mixes. After 30min incubation at 30C, binding reactions were loaded on  
497 6% polyacrylamide gels and separated by electrophoresis in 0.25X TBE. Fluorescence  
498 gel images were obtained and analyzed with a Chemidoc<sup>TM</sup> MP system and  
499 ImageLab<sup>TM</sup> software (Bio-Rad).

500

### 501 **Western Blot**

502 Total protein was extracted by grinding in lysis buffer (20mM Tris, pH 8.0, 150mM NaCl,  
503 1mM EDTA, pH 8.0, 1% Triton X-100, 1% SDS with fresh 5mM DTT, 10mM protease  
504 inhibitor). NF-YB2-YFP/HA and NF-YB2<sup>E65R</sup>-YFP/HA were detected using high affinity  
505 anti-HA primary antibody (cat#11 867 423 001; Roche) and goat anti-rat secondary  
506 antibody (cat#SC-2032; Santa Cruz Biotechnology). Horseradish peroxidase-based  
507 ECL plus reagent was used for visualization in a Bio-Rad ChemiDoc XRS imaging  
508 system. The membrane was stained with Ponceau S (cat#P3504; Sigma-Aldrich) to  
509 determine equivalent loading and transfer efficiency.

510

511 **Confocal imaging**

512 *p35S:NF-YB2-YFP* and *p35S:NF-YB2<sup>E65R</sup>:YFP* in *nf-yb2 nf-yb3* background, and *nf-yb2*  
513 *nf-yb3* seeds were cold stratified in the dark for 48-h then germinated and grown on B5  
514 media under 24hr light. Six to seven-day-old seedlings were counterstained with  
515 propidium iodide (PI) (50µg/mL) for five minutes, washed in DI water for five minutes  
516 and whole mounted in fresh DI water on standard slides. Hypocotyls were imaged with  
517 an Olympus FluoView 500 using a 60X WLSM objective. XYZ scans were taken with  
518 line sequential scanning mode where fluorescent signals were sampled using a filter-  
519 based detection system optimized for YFP and PI with chloroplast autofluorescence  
520 also detected in the latter. YFP was excited using a 488nm Argon laser whereas PI was  
521 excited using a 543nm Helium Neon laser. Approximately 50 serial sections were  
522 imaged with a cubic voxel size of 414nm x 414nm x 414nm. Image processing took  
523 place in ImageJ (<http://rsb.info.nih.gov/ij/>) where average intensity projections were  
524 taken from YFP and PI channels and merged.

525

526 **Yeast two-hybrid (Y2H) and three-hybrid (Y3H) analysis**

527 Entry clones of *NF-YA2* and *NF-YC9*, which were previously described (17, 41), were  
528 subcloned into pDEST<sup>TM</sup>22 (Invitrogen) and pTFT1 (66) respectively to obtain an  
529 activation domain (AD) and bridge construct. The DNA binding domain (DBD) and AD  
530 constructs for *NF-YB2* and *NF-YC9* were previously described (17). The plasmids were  
531 transferred to the yeast strains MaV203 (Invitrogen) for Y2H and PJ69-4α (67) for Y3H  
532 analysis. Protein interactions were tested according to the ProQuest<sup>TM</sup> manual  
533 (Invitrogen). For the X-Gal assay nitrocellulose membranes were frozen in liquid



534 nitrogen and placed on a filter paper saturated with Z-buffer containing X-Gal (5-bromo-  
535 4-chloro-3-indoxyl-beta-D-galactopyranoside, Gold Biotechnology, cat#Z4281L). For the  
536 synthetic dropout medium lacking the amino acid Histidine, 5mM 3-amino-1,2,4-triazole  
537 (3-AT) was added to eliminate nonspecific activation.

538

### 539 ***qPCR analysis***

540 Total RNA was collected from seven-day-old or nine-day-old seedlings according to  
541 instructions in the E.Z.N.A Plant RNA Kit (cat#R6827-01; Omega Biotek). First-strand  
542 cDNA synthesis was performed as previously described (41). For qPCR a CFX  
543 Connect<sup>TM</sup> Real-Time PCR Detection System (Bio-Rad) with the SYBR Green qPCR  
544 Master Mix (cat#K0222; Fermentas) was used. Results were analyzed using CFX  
545 Manager<sup>TM</sup> (Bio-Rad) where samples were normalized to a constitutively expressed  
546 reference gene At2G32170 (68). S1 Table lists primer sequences used for qPCR  
547 analysis.

548

### 549 **Author Contributions**

550 This project was conceived by BFH, RM, CLS, NG and RWK. CLS performed all  
551 experiments except: NG performed all EMSA experiments, DSJ performed confocal  
552 imaging, ZAM performed GUS staining assays and assisted with Y2H assays. BFH,  
553 CLS, and RM wrote the manuscript and all authors read and edited the manuscript.

554

### 555 **References**

- 556 1. Song YH, Shim JS, Kinmonth-Schultz HA, Imaizumi T. Photoperiodic flowering:  
557 time measurement mechanisms in leaves. *Annu Rev Plant Biol.* 2015;66:441-64.
- 558 2. Suarez-Lopez P, Wheatley K, Robson F, Onouchi H, Valverde F, Coupland G.  
559 CONSTANS mediates between the circadian clock and the control of flowering in  
560 Arabidopsis. *Nature.* 2001;410(6832):1116-20.
- 561 3. Jang S, Marchal V, Panigrahi KC, Wenkel S, Soppe W, Deng XW, et al.  
562 Arabidopsis COP1 shapes the temporal pattern of CO accumulation conferring a  
563 photoperiodic flowering response. *Embo J.* 2008;27(8):1277-88.
- 564 4. Liu LJ, Zhang YC, Li QH, Sang Y, Mao J, Lian HL, et al. COP1-mediated  
565 ubiquitination of CONSTANS is implicated in cryptochrome regulation of flowering in  
566 Arabidopsis. *Plant Cell.* 2008;20(2):292-306.
- 567 5. Valverde F, Mouradov A, Soppe W, Ravenscroft D, Samach A, Coupland G.  
568 Photoreceptor regulation of CONSTANS protein in photoperiodic flowering. *Science.*  
569 2004;303(5660):1003-6.
- 570 6. Hayama R, Coupland G. The molecular basis of diversity in the photoperiodic  
571 flowering responses of Arabidopsis and rice. *Plant Physiol.* 2004;135(2):677-84.
- 572 7. Song YH, Smith RW, To BJ, Millar AJ, Imaizumi T. FKF1 conveys timing  
573 information for CONSTANS stabilization in photoperiodic flowering. *Science.*  
574 2012;336(6084):1045-9.
- 575 8. Tiwari SB, Shen Y, Chang HC, Hou Y, Harris A, Ma SF, et al. The flowering time  
576 regulator CONSTANS is recruited to the FLOWERING LOCUS T promoter via a unique  
577 cis-element. *New Phytol.* 2010;187(1):57-66.

- 578 9. Lin MK, Belanger H, Lee YJ, Varkonyi-Gasic E, Taoka K, Miura E, et al.  
579 FLOWERING LOCUS T protein may act as the long-distance florigenic signal in the  
580 cucurbits. *Plant Cell*. 2007;19(5):1488-506.
- 581 10. Corbesier L, Vincent C, Jang S, Fornara F, Fan Q, Searle I, et al. FT protein  
582 movement contributes to long-distance signaling in floral induction of *Arabidopsis*.  
583 *Science*. 2007;316(5827):1030-3.
- 584 11. Mathieu J, Warthmann N, Kuttner F, Schmid M. Export of FT protein from phloem  
585 companion cells is sufficient for floral induction in *Arabidopsis*. *Current biology : CB*.  
586 2007;17(12):1055-60.
- 587 12. Tamaki S, Matsuo S, Wong HL, Yokoi S, Shimamoto K. Hd3a protein is a mobile  
588 flowering signal in rice. *Science*. 2007;316(5827):1033-6.
- 589 13. Ben-Naim O, Eshed R, Parnis A, Teper-Bamnolker P, Shalit A, Coupland G, et al.  
590 The CCAAT binding factor can mediate interactions between CONSTANS-like proteins  
591 and DNA. *Plant J*. 2006;46(3):462-76.
- 592 14. Cao S, Kumimoto RW, Gnesutta N, Calogero AM, Mantovani R, Holt BF, III. A  
593 Distal CCAAT/NUCLEAR FACTOR Y Complex Promotes Chromatin Looping at the  
594 FLOWERING LOCUS T Promoter and Regulates the Timing of Flowering in  
595 *Arabidopsis*. *Plant Cell*. 2014;26:1009-17.
- 596 15. Hou X, Zhou J, Liu C, Liu L, Shen L, Yu H. Nuclear factor Y-mediated H3K27me3  
597 demethylation of the SOC1 locus orchestrates flowering responses of *Arabidopsis*.  
598 *Nature communications*. 2014;5:4601.
- 599 16. Kumimoto RW, Adam L, Hymus GJ, Repetti PP, Reuber TL, Marion CM, et al.  
600 The Nuclear Factor Y subunits NF-YB2 and NF-YB3 play additive roles in the promotion

- 601 of flowering by inductive long-day photoperiods in Arabidopsis. *Planta*.  
602 2008;228(5):709-23.
- 603 17. Kumimoto RW, Zhang Y, Siefers N, Holt III BF. NF-YC3, NF-YC4 and NF-YC9  
604 are required for CONSTANS-mediated, photoperiod-dependent flowering in Arabidopsis  
605 thaliana. *Plant J*. 2010;63:379-91.
- 606 18. Wenkel S, Turck F, Singer K, Gissot L, Le Gourrierc J, Samach A, et al.  
607 CONSTANS and the CCAAT box binding complex share a functionally important  
608 domain and interact to regulate flowering of Arabidopsis. *Plant Cell*. 2006;18(11):2971-  
609 84.
- 610 19. Laloum T, Baudin M, Frances L, Lepage A, Billault-Penneteau B, Cerri MR, et al.  
611 Two CCAAT-box-binding transcription factors redundantly regulate early steps of the  
612 legume-rhizobia endosymbiosis. *Plant J*. 2014;79(5):757-68.
- 613 20. Petroni K, Kumimoto RW, Gnesutta N, Calvenzani V, Fornari M, Tonelli C, et al.  
614 The Promiscuous Life of Plant NUCLEAR FACTOR Y Transcription Factors. *Plant Cell*.  
615 2012;24(12):4777-92.
- 616 21. Sinha S, Maity SN, Lu J, de Crombrughe B. Recombinant rat CBF-C, the third  
617 subunit of CBF/NFY, allows formation of a protein-DNA complex with CBF-A and CBF-B  
618 and with yeast HAP2 and HAP3. *Proc Natl Acad Sci U S A*. 1995;92(5):1624-8.
- 619 22. Sinha S, Kim IS, Sohn KY, de Crombrughe B, Maity SN. Three classes of  
620 mutations in the A subunit of the CCAAT-binding factor CBF delineate functional  
621 domains involved in the three-step assembly of the CBF-DNA complex. *Mol Cell Biol*.  
622 1996;16(1):328-37.

- 623 23. Kahle J, Baake M, Doenecke D, Albig W. Subunits of the heterotrimeric  
624 transcription factor NF-Y are imported into the nucleus by distinct pathways involving  
625 importin beta and importin 13. *Mol Cell Biol.* 2005;25(13):5339-54.
- 626 24. Frontini M, Imbriano C, Manni I, Mantovani R. Cell cycle regulation of NF-YC  
627 nuclear localization. *Cell Cycle.* 2004;3(2):217-22.
- 628 25. Mantovani R. The molecular biology of the CCAAT-binding factor NF-Y. *Gene.*  
629 1999;239(1):15-27.
- 630 26. Kusnetsov V, Landsberger M, Meurer J, Oelmuller R. The assembly of the  
631 CAAT-box binding complex at a photosynthesis gene promoter is regulated by light,  
632 cytokinin, and the stage of the plastids. *J Biol Chem.* 1999;274(50):36009-14.
- 633 27. Nardini M, Gnesutta N, Donati G, Gatta R, Forni C, Fossati A, et al. Sequence-  
634 specific transcription factor NF-Y displays histone-like DNA binding and H2B-like  
635 ubiquitination. *Cell.* 2013;152(1-2):132-43.
- 636 28. Cai X, Ballif J, Endo S, Davis E, Liang M, Chen D, et al. A putative CCAAT-  
637 binding transcription factor is a regulator of flowering timing in Arabidopsis. *Plant*  
638 *Physiol.* 2007;145(1):98-105.
- 639 29. Chen NZ, Zhang XQ, Wei PC, Chen QJ, Ren F, Chen J, et al. AtHAP3b plays a  
640 crucial role in the regulation of flowering time in Arabidopsis during osmotic stress.  
641 *Journal of biochemistry and molecular biology.* 2007;40(6):1083-9.
- 642 30. Adrian J, Farrona S, Reimer JJ, Albani MC, Coupland G, Turck F. cis-Regulatory  
643 elements and chromatin state coordinately control temporal and spatial expression of  
644 FLOWERING LOCUS T in Arabidopsis. *Plant Cell.* 2010;22(5):1425-40.

- 645 32. Xu MY, Zhang L, Li WW, Hu XL, Wang MB, Fan YL, et al. Stress-induced early  
646 flowering is mediated by miR169 in *Arabidopsis thaliana*. *J Exp Bot.* 2014;65(1):89-101.
- 647 33. Siefers N, Dang KK, Kumimoto RW, Bynum WE, IV, Tayrose G, Holt BF, III.  
648 Tissue-specific expression patterns of *Arabidopsis* NF-Y transcription factors suggest  
649 potential for extensive combinatorial complexity. *Plant Physiol.* 2009;149(2):625-41.
- 650 34. Xing Y, Fikes JD, Guarente L. Mutations in yeast HAP2/HAP3 define a hybrid  
651 CCAAT box binding domain. *Embo J.* 1993;12(12):4647-55.
- 652 35. Kobayashi Y, Kaya H, Goto K, Iwabuchi M, Araki T. A pair of related genes with  
653 antagonistic roles in mediating flowering signals. *Science.* 1999;286(5446):1960-2.
- 654 36. Yan WH, Wang P, Chen HX, Zhou HJ, Li QP, Wang CR, et al. A major QTL,  
655 *Ghd8*, plays pleiotropic roles in regulating grain productivity, plant height, and heading  
656 date in rice. *Molecular plant.* 2011;4(2):319-30.
- 657 37. Hackenberg D, Wu Y, Voigt A, Adams R, Schramm P, Grimm B. Studies on  
658 differential nuclear translocation mechanism and assembly of the three subunits of the  
659 *Arabidopsis thaliana* transcription factor NF-Y. *Molecular plant.* 2012;5(4):876-88.
- 660 38. Tiwari SB, Belachew A, Ma SF, Young M, Ade J, Shen Y, et al. The EDLL motif:  
661 a potent plant transcriptional activation domain from AP2/ERF transcription factors.  
662 *Plant J.* 2012;70(5):855-65.
- 663 39. Liang M, Hole D, Wu J, Blake T, Wu Y. Expression and functional analysis of  
664 NUCLEAR FACTOR-Y, subunit B genes in barley. *Planta.* 2012;235(4):779-91.
- 665 40. Yoo SK, Chung KS, Kim J, Lee JH, Hong SM, Yoo SJ, et al. CONSTANS  
666 activates SUPPRESSOR OF OVEREXPRESSION OF CONSTANS 1 through

- 667 FLOWERING LOCUS T to promote flowering in Arabidopsis. *Plant Physiol.*  
668 2005;139(2):770-8.
- 669 41. Siriwardana CL, Kumimoto RW, Jones DS, Holt BF, 3rd. Gene Family Analysis of  
670 the Transcription Factors Reveals Opposing Abscisic Acid Responses During Seed  
671 Germination. *Plant Mol Biol Report.* 2014;32(5):971-86.
- 672 42. An H, Roussot C, Suarez-Lopez P, Corbesier L, Vincent C, Pineiro M, et al.  
673 CONSTANS acts in the phloem to regulate a systemic signal that induces photoperiodic  
674 flowering of Arabidopsis. *Development.* 2004;131(15):3615-26.
- 675 43. Notaguchi M, Abe M, Kimura T, Daimon Y, Kobayashi T, Yamaguchi A, et al.  
676 Long-distance, graft-transmissible action of Arabidopsis FLOWERING LOCUS T protein  
677 to promote flowering. *Plant Cell Physiol.* 2008;49(11):1645-58.
- 678 44. Kardailsky I, Shukla VK, Ahn JH, Dagenais N, Christensen SK, Nguyen JT, et al.  
679 Activation tagging of the floral inducer FT. *Science.* 1999;286(5446):1962-5.
- 680 45. Pagnussat GC, Yu HJ, Ngo QA, Rajani S, Mayalagu S, Johnson CS, et al.  
681 Genetic and molecular identification of genes required for female gametophyte  
682 development and function in Arabidopsis. *Development.* 2005;132(3):603-14.
- 683 46. Meinke D, Muralla R, Sweeney C, Dickerman A. Identifying essential genes in  
684 Arabidopsis thaliana. *Trends in plant science.* 2008;13(9):483-91.
- 685 47. Stephenson TJ, McIntyre CL, Collet C, Xue GP. Genome-wide identification and  
686 expression analysis of the NF-Y family of transcription factors in *Triticum aestivum*.  
687 *Plant Mol Biol.* 2007;65(1-2):77-92.

- 688 48. Thirumurugan T, Ito Y, Kubo T, Serizawa A, Kurata N. Identification,  
689 characterization and interaction of HAP family genes in rice. *Mol Genet Genomics*.  
690 2008;279(3):279-89.
- 691 49. Cao S, Kumimoto RW, Siriwardana CL, Risinger JR, Holt BF, III. Identification  
692 and Characterization of NF-Y Transcription Factor Families in the Monocot Model Plant  
693 *Brachypodium distachyon*. *PLoS ONE*. 2011;6(6):e21805.
- 694 50. Kim IS, Sinha S, de Crombrughe B, Maity SN. Determination of functional  
695 domains in the C subunit of the CCAAT-binding factor (CBF) necessary for formation of  
696 a CBF-DNA complex: CBF-B interacts simultaneously with both the CBF-A and CBF-C  
697 subunits to form a heterotrimeric CBF molecule. *Mol Cell Biol*. 1996;16(8):4003-13.
- 698 51. Kumimoto RW, Siriwardana CL, Gayler KK, Risinger JR, Siefers N, Holt BF, 3rd.  
699 NUCLEAR FACTOR Y Transcription Factors Have Both Opposing and Additive Roles in  
700 ABA-Mediated Seed Germination. *PLoS One*. 2013;8(3):e59481.
- 701 52. Leyva-Gonzalez MA, Ibarra-Laclette E, Cruz-Ramirez A, Herrera-Estrella L.  
702 Functional and transcriptome analysis reveals an acclimatization strategy for abiotic  
703 stress tolerance mediated by Arabidopsis NF-YA family members. *PLoS One*.  
704 2012;7(10):e48138.
- 705 53. Mu J, Tan H, Hong S, Liang Y, Zuo J. Arabidopsis Transcription Factor Genes  
706 NF-YA1, 5, 6, and 9 Play Redundant Roles in Male Gametogenesis, Embryogenesis,  
707 and Seed Development. *Molecular plant*. 2012.
- 708 54. Michaels SD, Amasino RM. Loss of FLOWERING LOCUS C activity eliminates  
709 the late-flowering phenotype of FRIGIDA and autonomous pathway mutations but not  
710 responsiveness to vernalization. *Plant Cell*. 2001;13(4):935-41.



- 711 55. Pin PA, Nilsson O. The multifaceted roles of FLOWERING LOCUS T in plant  
712 development. *Plant Cell Environ.* 2012;35(10):1742-55.
- 713 56. Liu L, Adrian J, Pankin A, Hu J, Dong X, von Korff M, et al. Induced and natural  
714 variation of promoter length modulates the photoperiodic response of FLOWERING  
715 LOCUS T. *Nature communications.* 2014;5:4558.
- 716 57. Huala E, Dickerman AW, Garcia-Hernandez M, Weems D, Reiser L, LaFond F,  
717 et al. The Arabidopsis Information Resource (TAIR): a comprehensive database and  
718 web-based information retrieval, analysis, and visualization system for a model plant.  
719 *Nucleic Acids Res.* 2001;29(1):102-5.
- 720 58. Thompson JD, Gibson TJ, Higgins DG. Multiple sequence alignment using  
721 ClustalW and ClustalX. *Curr Protoc Bioinformatics.* 2002;Chapter 2:Unit 2 3.
- 722 59. Kay R, Chan A, Daly M, McPherson J. Duplication of CaMV 35S promoter  
723 sequences creates a strong enhancer for plant genes. *Science.* 1987;236:1299-302.
- 724 60. Earley KW, Haag JR, Pontes O, Opper K, Juehne T, Song K, et al. Gateway-  
725 compatible vectors for plant functional genomics and proteomics. *Plant J.*  
726 2006;45(4):616-29.
- 727 61. Karimi M, Inze D, Depicker A. GATEWAY vectors for Agrobacterium-mediated  
728 plant transformation. *Trends in plant science.* 2002;7(5):193-5.
- 729 62. Koornneef M, Hanhart CJ, van der Veen JH. A genetic and physiological analysis  
730 of late flowering mutants in *Arabidopsis thaliana*. *Molecular & general genetics : MGG.*  
731 1991;229(1):57-66.
- 732 63. Clough SJ, Bent AF. Floral dip: a simplified method for Agrobacterium-mediated  
733 transformation of *Arabidopsis thaliana*. *Plant J.* 1998;16(6):735-43.

- 734 64. Diebold ML, Fribourg S, Koch M, Metzger T, Romier C. Deciphering correct  
735 strategies for multiprotein complex assembly by co-expression: application to  
736 complexes as large as the histone octamer. *J Struct Biol.* 2011;175(2):178-88.
- 737 65. Calvenzani V, Testoni B, Gusmaroli G, Lorenzo M, Gnesutta N, Petroni K, et al.  
738 Interactions and CCAAT-Binding of *Arabidopsis thaliana* NF-Y Subunits. *PLoS One.*  
739 2012;7(8):e42902.
- 740 66. Ciannamea S, Kaufmann K, Frau M, Tonaco IA, Petersen K, Nielsen KK, et al.  
741 Protein interactions of MADS box transcription factors involved in flowering in *Lolium*  
742 *perenne*. *J Exp Bot.* 2006;57(13):3419-31.
- 743 67. James P, Halladay J, Craig EA. Genomic libraries and a host strain designed for  
744 highly efficient two-hybrid selection in yeast. *Genetics.* 1996;144(4):1425-36.
- 745 68. Czechowski T, Stitt M, Altmann T, Udvardi MK, Scheible WR. Genome-wide  
746 identification and testing of superior reference genes for transcript normalization in  
747 *Arabidopsis*. *Plant Physiol.* 2005;139(1):5-17.

748

## 749 **Supplemental Information**

750

### 751 **S1 Table. List of Primers.**

752

753 **S1 Fig. *NF-YA2* is expressed in *pNF-YA2:NF-YA2* plants.** Quantification of *NF-YA2*  
754 expression in *pNF-YA2:NF-YA2* plants used for qPCR analysis. Asterisks represent  
755 significant differences derived from student's T-test ( $P < 0.05$ ).

756

757 **S2 Fig. NF-YB2<sup>E65R</sup> is expressed in the *nf-yb2 nf-yb3* background.** (A) Confocal  
758 images of NF-YB2 and NF-YB2<sup>E65R</sup> protein localization in stable plant lines. (B) Protein  
759 expression in 12 individual T1 *p35S:NF-YB2<sup>E65R</sup>* plants compared to a stable strongly  
760 expressed *p35S:NF-YB2* in the *nf-yb2 nf-yb3* background. (C) Protein expression in two  
761 stable plant lines each for *p35S:NF-YB2* and *p35S:NF-YB2<sup>E65R</sup>* in the *nf-yb2 nf-yb3*  
762 background.

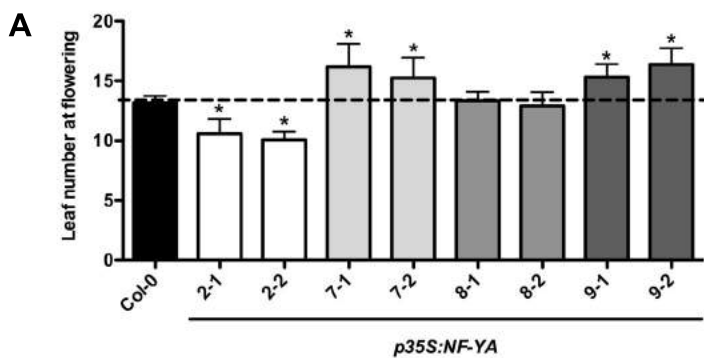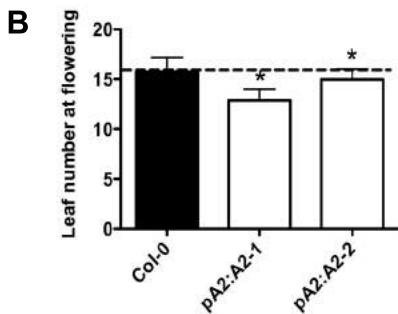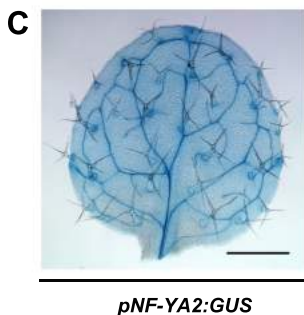

**D** 7-day old seedlings

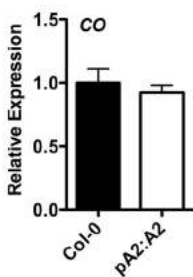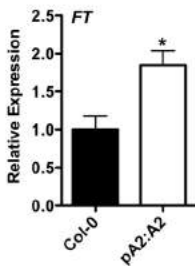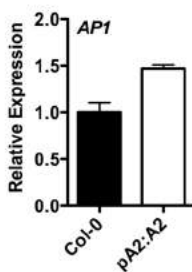

9-day old seedlings

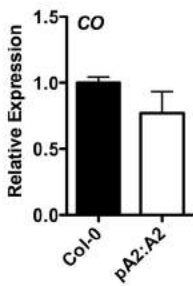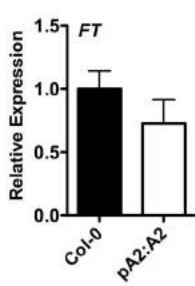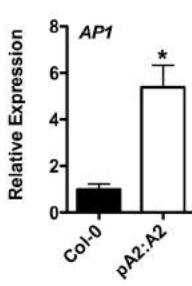

**A**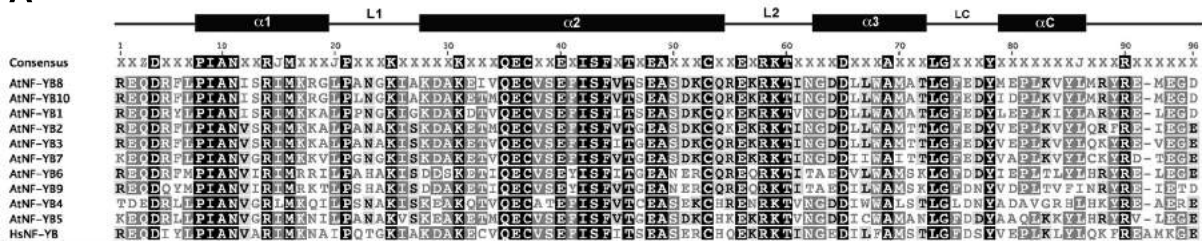

NF-YA contacts

E Q SE E E L  
 \*

**B**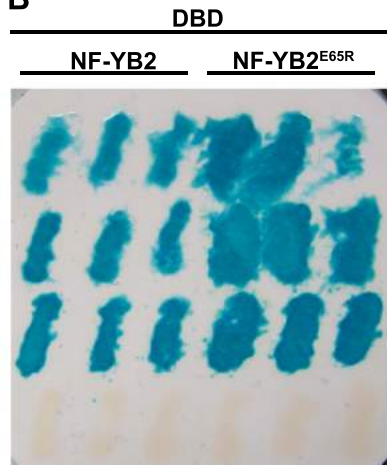**C**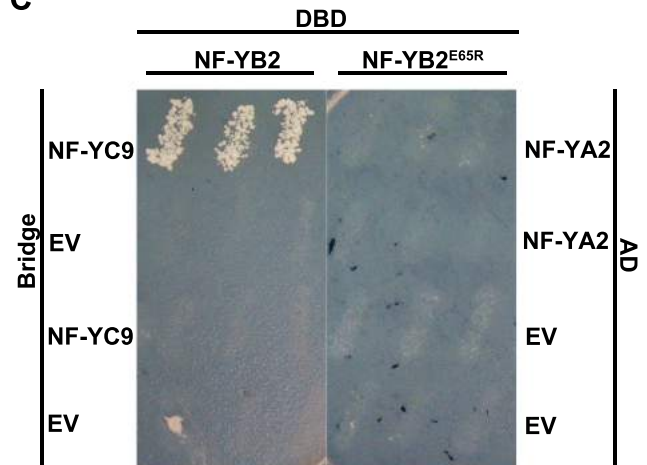

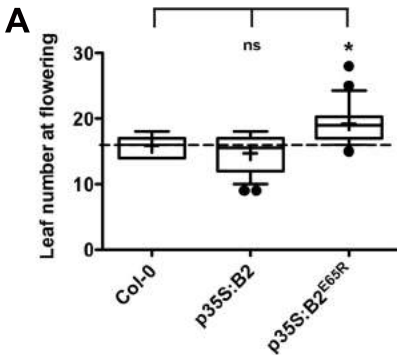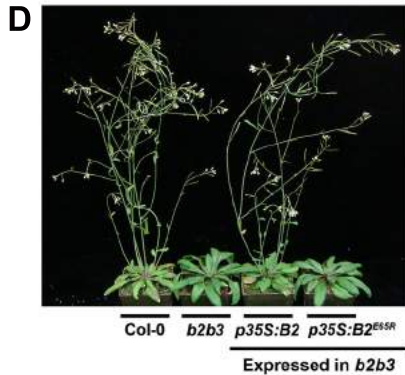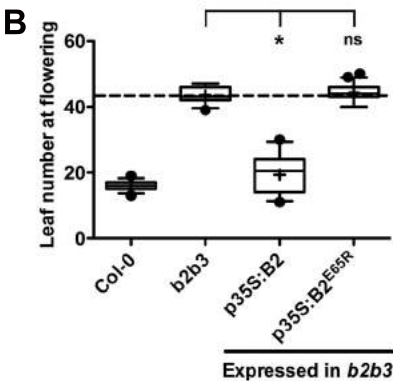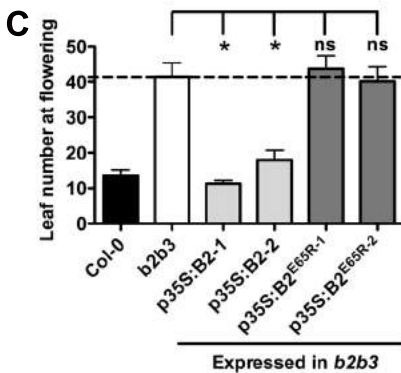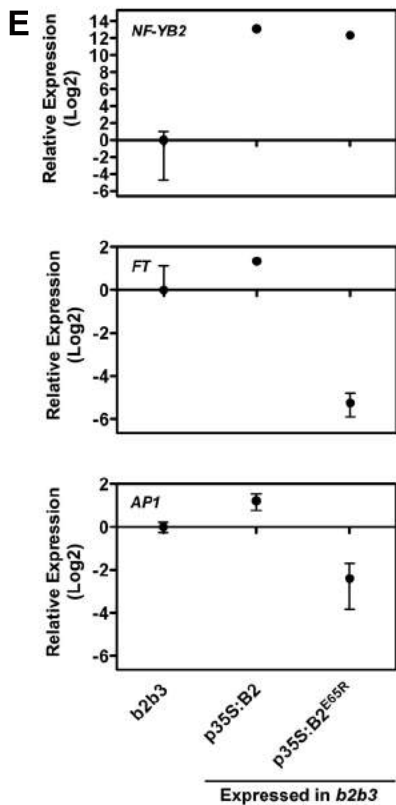

**FT CCAAT Probe**

NF-YB2/NF-YC3

NF-YA or CO

WT

NF-YA2

NF-YA6

YA2  
YA6

empty

empty

B2<sup>E65R</sup>

NF-YA2

WT

B2<sup>E65R</sup>

CO

NF-Y

fp

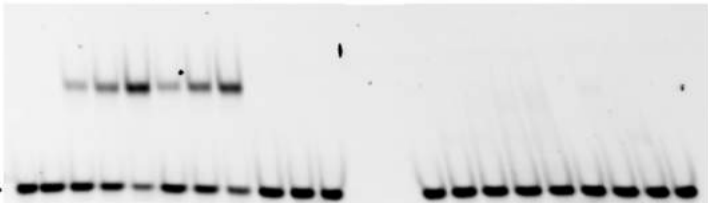

1 2 3 4 5 6 7 8 9 10 11 12 13 14 15 16 17 18 19 20 21 22

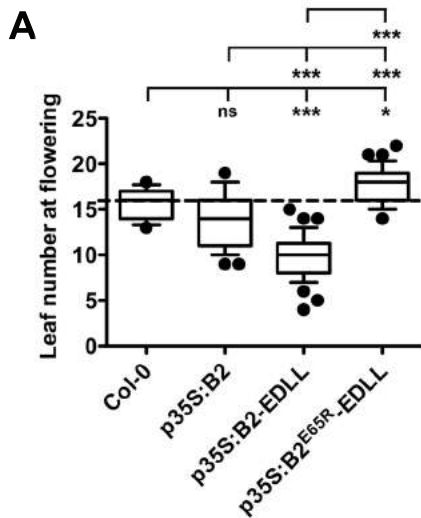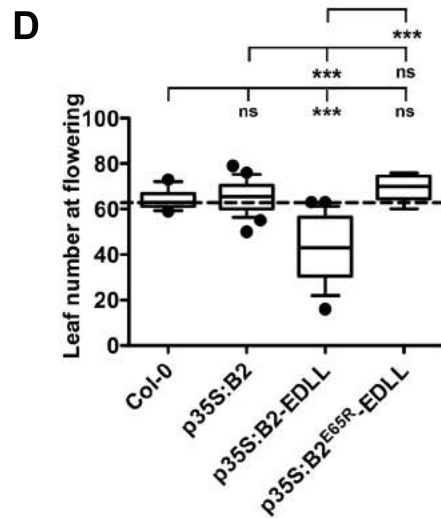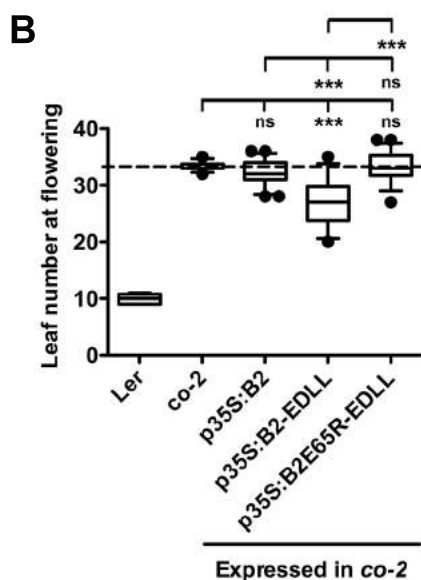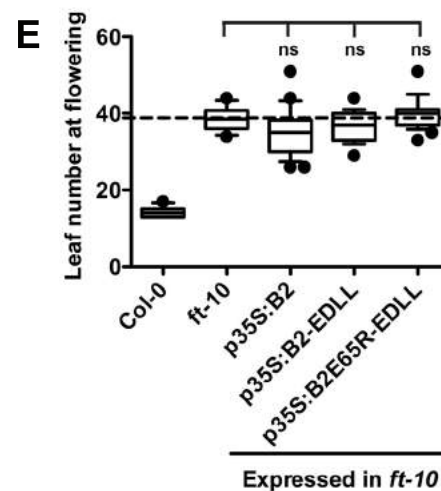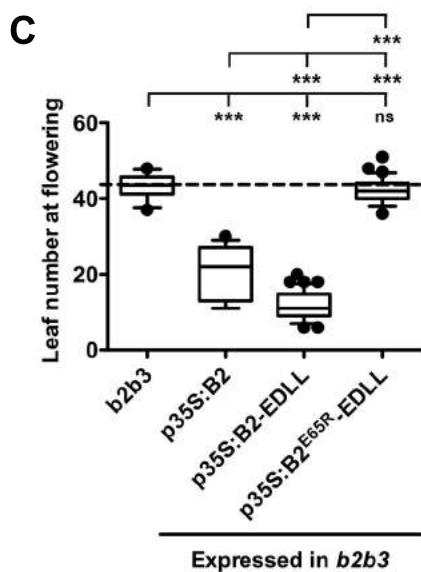



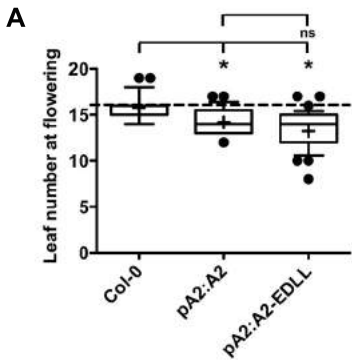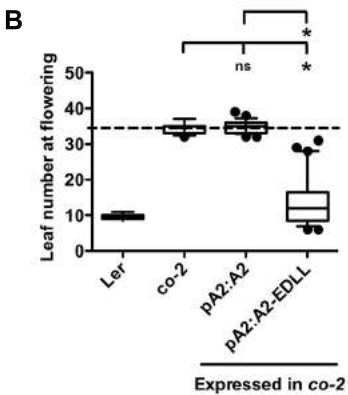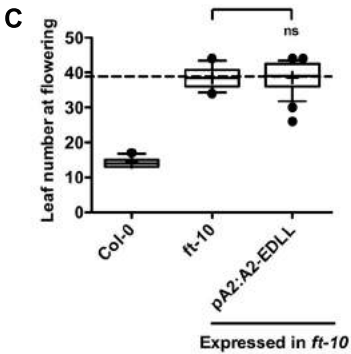

Source: http://biorxiv.org/content/10.1101/066399v1.full.pdf
